# Supplementary material for: An expanded view of ligandability in the allosteric enzyme PTP1B from computational reanalysis of large-scale crystallographic data
Source: PubMed Central journal article supplement (PMC10802458; doi:10.1101/2024.01.05.574428), 2024-01-07
Supplement: media-1.pdf [file media-1.pdf]

## Supplementary Information

An expanded view of ligandability in the allosteric enzyme PTP1B from computational reanalysis of large-scale crystallographic data

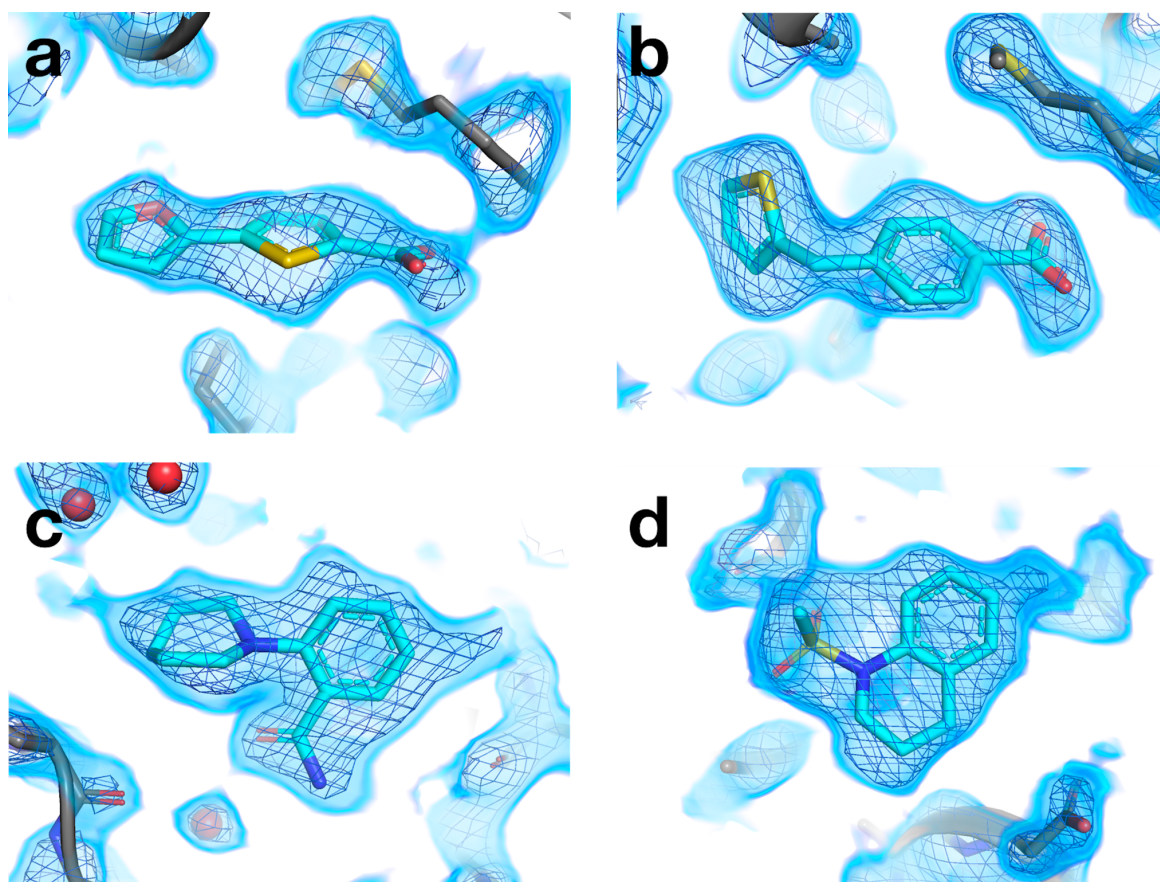

**Figure S1: Pre-clustering of datasets reveals new structures of small-molecule fragments bound to PTP1B.**

Several examples of event maps from PanDDA after cluster4x that reveal new fragment binding hits.

- PDB ID 7GSM (y0721); event map contoured at  $1.5 \sigma$ .
- PDB ID 7GSN (y0723); event map contoured at  $1.5 \sigma$ .
- PDB ID 7GSR (y0876); event map contoured at  $1.75 \sigma$ .
- PDB ID 7GST (y0891); event map contoured at  $1.75 \sigma$ .

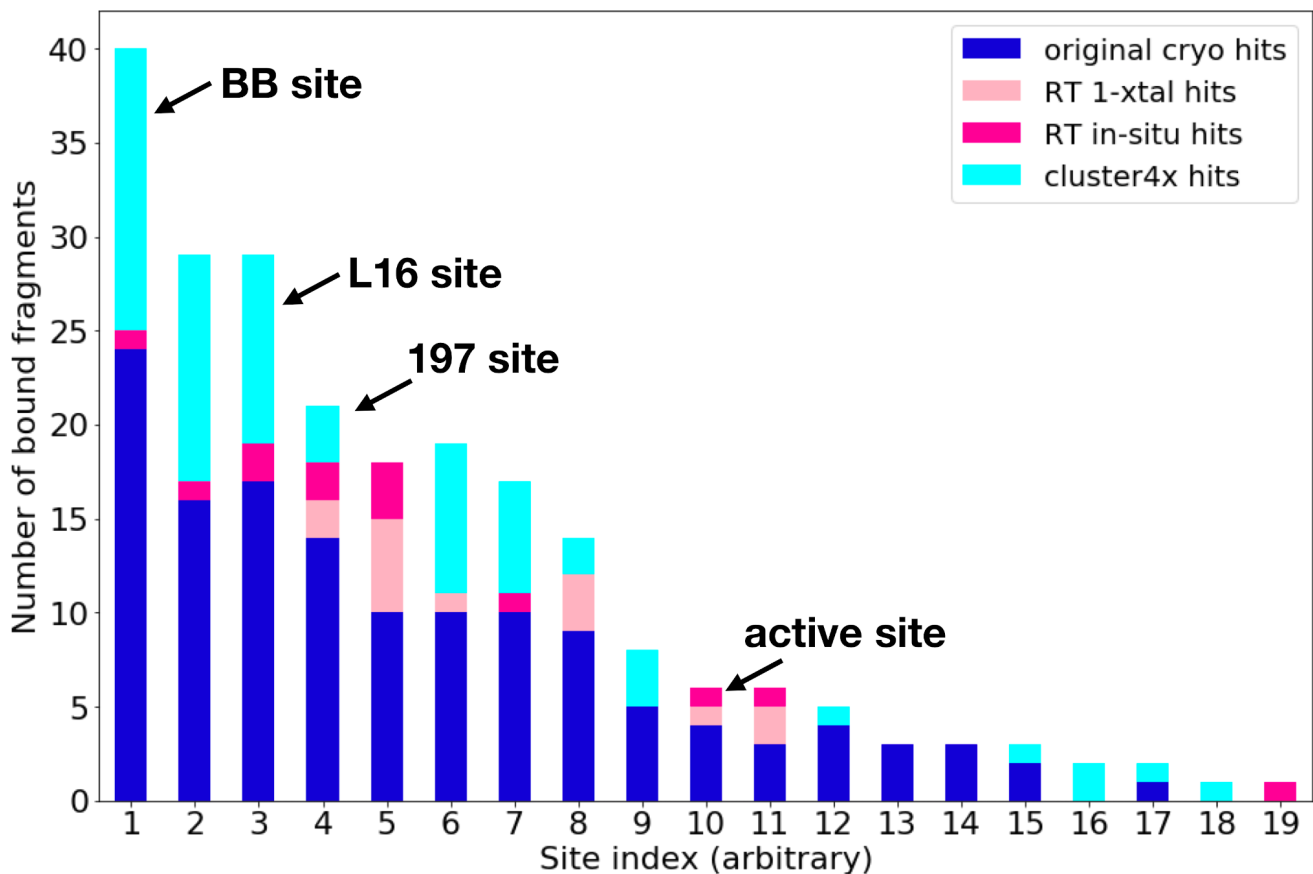

**Figure S2: Overview of new fragment hits across binding sites, compared to previous screens.**

Overview of fragment hits from original cryogenic-temperature screen <sup>2</sup>, both room-temperature (RT) screens <sup>3</sup>, and new hits reported in this study. Key sites in PTP1B, including three allosteric sites and the active site, are annotated. NB: site numbers do not coincide with previous site numbering <sup>2</sup>.

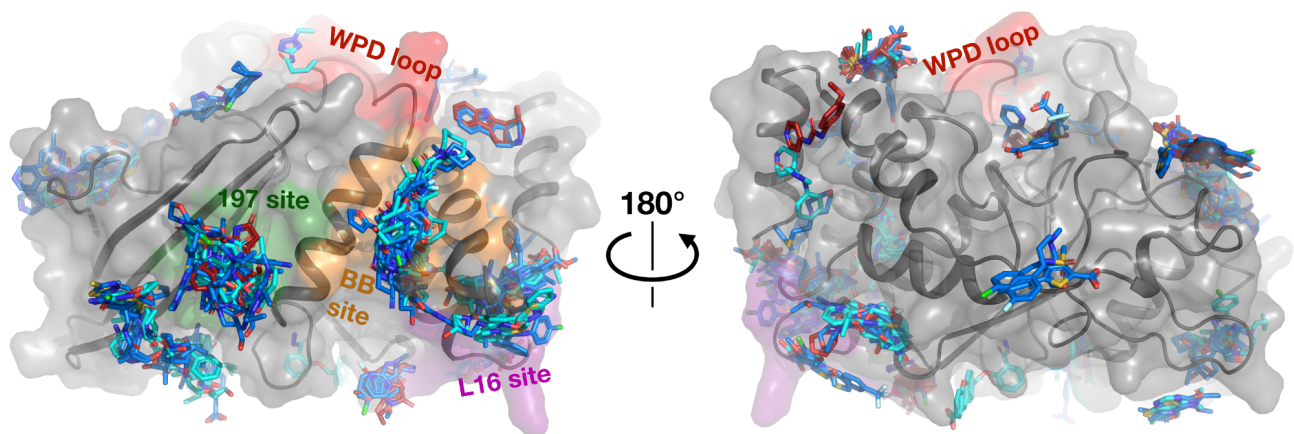

**Figure S3: Structural overview of small-molecule fragment hits for PTP1B, including room-temperature hits.**

Same as **Fig. 2**, but with structures from the original cryogenic-temperature screen <sup>2</sup> (blue) and room-temperature (RT) screens <sup>3</sup> (red) overlaid.

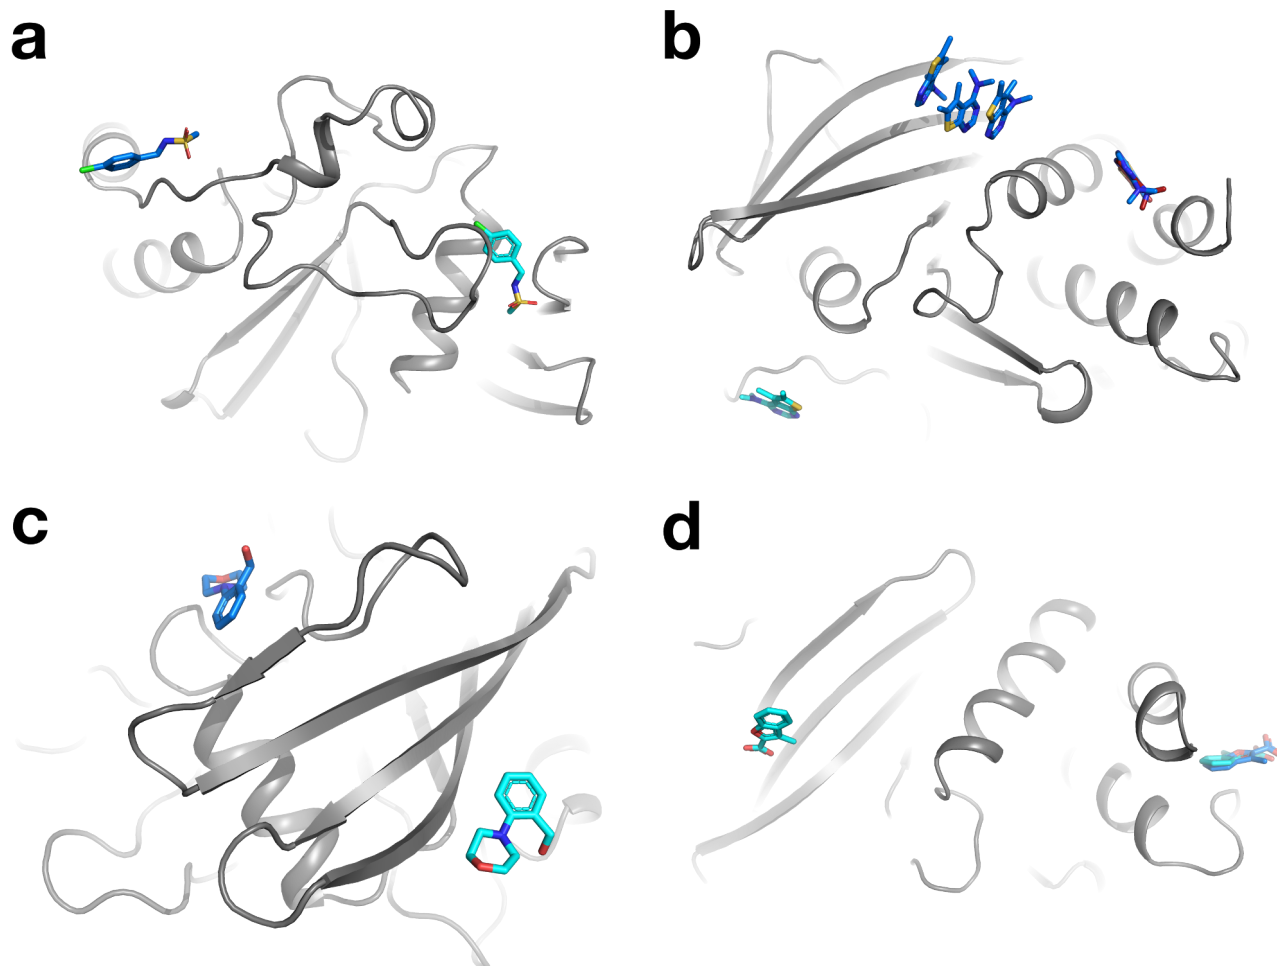

**Figure S4: Increased coverage from promiscuous fragments.**

Additional binding events for fragments with previously reported hits, now in different sites and/or datasets.

- a. Same dataset, new site (PDB ID 7GSQ, y0847).
- b. Same dataset, new site (PDB ID 7GS8, y0205). The new hit is distinct from the original cryo hits, which included binding at two sites: one with a single fragment molecule, and one with three fragment molecules in an artifactual stacking arrangement<sup>2,3</sup>. The new hit is also distinct from the single binding event for this fragment at RT<sup>3</sup>.
- c. New dataset for same fragment, new site (PDB ID 7GTJ, y1827).
- d. New dataset for same fragment, same site plus new site (PDB ID 7GSX, y0986).
